# Supplementary material
Source: publisher figshare collection journal article supplement (https://gsapubs.figshare.com/ndownloader/files/22742792)
Supplement: Supplementary file 1 [file 22742792]

TABLE 2. TRACE ELEMENT AND ISOTOPIC DATA, SOUTHERN RIO GRANDE RIFT VOLCANIC ROCKS

| Sample | Unit                | Lithology                | Age <sup>*</sup><br>(Ma) | La <sup>#</sup><br>(ppm) | Ta <sup>#</sup><br>(ppm) | Nd <sup>**</sup><br>(ppm) | Sm <sup>**</sup><br>(ppm) | <sup>143</sup> Nd/ <sup>144</sup> Nd <sup>##</sup> | ε <sub>Nd</sub> <sup>***</sup> |
|--------|---------------------|--------------------------|--------------------------|--------------------------|--------------------------|---------------------------|---------------------------|----------------------------------------------------|--------------------------------|
| RP009  | Rubio Peak          | Andesitic lava           | 40.0                     | 28.3                     | 0.44                     | 27.0                      | 5.15                      | 0.512418                                           | -4.0                           |
| RP012  | Rubio Peak          | Andesitic lava           | 40.0                     | n.d.                     | n.d.                     | n.d.                      | n.d.                      | 0.512392                                           | -4.5                           |
| RP013  | Rubio Peak          | Andesitic lava           | 40.0                     | n.d.                     | n.d.                     | n.d.                      | n.d.                      | 0.512361                                           | -5.1                           |
| BT007  | Bell Top            | Basaltic andesitic lava  | 35.0                     | n.d.                     | n.d.                     | n.d.                      | n.d.                      | 0.512467                                           | -2.9                           |
| UBA011 | Uvas volcanic field | Basaltic lava            | 27.0                     | 23.3                     | 0.51                     | 28.1                      | 6.24                      | 0.512466                                           | -3.1                           |
| UBA023 | Uvas volcanic field | Andesitic lava           | 27.0                     | 47.5                     | 0.94                     | n.d.                      | 9.17                      | 0.512385                                           | -4.6                           |
| UBA025 | Uvas volcanic field | Basaltic lava            | 27.0                     | 9.4                      | 0.21                     | 12.3                      | 3.34                      | 0.512644                                           | 0.2                            |
| UBA026 | Uvas volcanic field | Andesitic lava           | 27.0                     | 48.2                     | 0.70                     | n.d.                      | 8.43                      | 0.512374                                           | -4.8                           |
| UBA029 | Uvas volcanic field | Basaltic andesitic lava  | 27.0                     | 37.2                     | 0.65                     | n.d.                      | 7.91                      | 0.512512                                           | -2.2                           |
| UBA034 | Uvas volcanic field | Basaltic andesitic lava  | 27.0                     | 41.5                     | 0.69                     | n.d.                      | 8.98                      | 0.512466                                           | -3.1                           |
| UBA089 | Uvas volcanic field | Basaltic lava            | 27.0                     | 34.5                     | 1.33                     | 35.4                      | 7.49                      | 0.512434                                           | -3.7                           |
| DH01   | Selden basalt       | Tholeiitic basaltic lava | 9.8                      | 18.5                     | 1.93                     | n.d.                      | 4.76                      | 0.512994                                           | 7.0                            |
| DH03   | Robledo basalt      | Trachybasaltic lava      | 7.1                      | 43.6                     | 5.05                     | n.d.                      | 7.53                      | 0.513006                                           | 7.3                            |
| DH05   | Columbus basalt     | Tephritic lava           | 3.0                      | 35.3                     | 3.79                     | n.d.                      | 6.81                      | 0.513011                                           | 7.3                            |
| DH06   | Columbus basalt     | Tephritic lava           | 5.2                      | 47.7                     | 5.34                     | n.d.                      | 12.44                     | 0.513005                                           | 7.2                            |
| DH07   | Columbus basalt     | Trachybasaltic lava      | 3.9                      | 49.5                     | 4.67                     | n.d.                      | 9.00                      | 0.512967                                           | 6.5                            |

<sup>\*</sup> Approximate ages estimated stratigraphically; DH01, DH03, DH05 - DH07 are K-Ar age determinations from Seager et al. (1984).

<sup>#</sup> La and Ta determined by neutron activation analysis at the University of Texas at El Paso using software by W. V. Boynton by license agreement. U.S. Geological Survey standards AGV-1, BHVO-1, STM-1 and NBS standard NBS688 were used for calibration. Two-sigma precision is <1% for La and <3% for Ta. Error in La/Ta is ~6.5%.

<sup>\*\*</sup> Nd and Sm determined by neutron activation analysis at the University of Texas at El Paso. Two-sigma precision is < 6.5% for Nd and < 2% for Sm.

<sup>##</sup> <sup>143</sup>Nd/<sup>144</sup>Nd determined by mass spectrometry at McMaster University using methods described in Gibson et al. (1995). Within-run 2-sigma precision is +0.000 011.

<sup>\*\*\*</sup> ε<sub>Nd</sub> calculated at the estimated age of the unit. If necessary, Nd concentrations interpolated between La and Sm were used to calculate initial <sup>143</sup>Nd/<sup>144</sup>Nd ratios. If rare earth element data were unavailable, initial ratios were calculated using Sm/Nd of lavas of similar major and trace element composition. Maximum error in ε<sub>Nd</sub> from these estimations is +0.6 epsilon units.

TABLE 1. TRACE ELEMENT AND ISOTOPIC DATA, BISBEE BASIN VOLCANIC ROCKS

| Sample   | Unit         | Lithology                     | Age <sup>*</sup><br>(Ma) | La <sup>#</sup><br>(ppm) | Ta <sup>#</sup><br>(ppm) | Nd <sup>**</sup><br>(ppm) | Sm <sup>**</sup><br>(ppm) | <sup>143</sup> Nd/ <sup>144</sup> Nd <sup>##</sup> | ε <sub>Nd</sub> <sup>***</sup> |
|----------|--------------|-------------------------------|--------------------------|--------------------------|--------------------------|---------------------------|---------------------------|----------------------------------------------------|--------------------------------|
| BB307    | Glance       | Andesitic lava                | 160                      | 43.0                     | 0.91                     | 22.70                     | 4.50                      | 0.512381                                           | -3.45                          |
| BB309    | Glance       | Andesitic lava                | 160                      | 30.9                     | 0.93                     | 58.34                     | 10.14                     | 0.512399                                           | -2.79                          |
| GD9514   | Dike         | Trachybasalt                  | 150                      | 13.7                     | 1.00                     | 17.34                     | 4.34                      | 0.512743                                           | 2.92                           |
| GTCL9511 | Crystal Cave | Spilitic hyaloclastite        | 153                      | 16.5                     | 1.10                     | 19.11                     | 4.31                      | 0.512766                                           | 3.67                           |
| PB9512   | Crystal Cave | Spilitic hyaloclastite        | 153                      | 26.7                     | 1.70                     | 25.56                     | 5.20                      | 0.512772                                           | 4.06                           |
| 96HF21   | Dike         | Trachybasalt                  | 150                      | 21.1                     | 1.50                     | 21.90                     | 4.76                      | 0.512798                                           | 4.37                           |
| BB094    | Crystal Cave | Spilitic hyaloclastite        | 153                      | 15.5                     | 1.27                     | 17.30                     | 4.00                      | 0.512779                                           | 3.86                           |
| BB095    | Crystal Cave | Spilitic hyaloclastite        | 153                      | 17.2                     | 1.37                     | 19.50                     | 4.40                      | 0.512839                                           | 5.11                           |
| BB302    | Onion Saddle | Trachybasaltic lava           | 150                      | 22.1                     | 1.79                     | 21.62                     | 4.52                      | 0.512795                                           | 4.41                           |
| BB306    | Onion Saddle | Basaltic trachyandesitic lava | 150                      | 35.8                     | 2.21                     | 30.45                     | 5.77                      | 0.512768                                           | 4.11                           |

<sup>\*</sup> Approximate ages estimated stratigraphically.

<sup>#</sup> La and Ta (ppm) determined by neutron activation analysis at the University of Texas at El Paso using software by W. V. Boynton by license agreement. U.S. Geological Survey standards AGV-1, BHVO-1, STM-1 and NBS standard NBS688 were used for calibration. Two-sigma precision is <1% for La and <3% for Ta. Error in La/Ta is ~ 6.5%.

<sup>\*\*</sup> Nd and Sm determined by isotopic dilution at the University of California, Santa Cruz. Nd and Sm for BB094 and BB095 determined by neutron activation analysis at University of Texas at El Paso.

<sup>##</sup> <sup>143</sup>Nd/<sup>144</sup>Nd determined by mass spectrometry at University of California, Santa Cruz. Analytical error ranges from +0.000005 to +0.000010. Samples were spiked with <sup>150</sup>Nd and <sup>149</sup>Sm tracers before digestion in Parr bombs, which sat at 180 °C for 3 days. Complete digestion was achieved. Samples were then passed through a cation exchange column (Dowex AG509X) to concentrate the rare earth elements before Nd and Sm were separated on consisting of Teflon beads coated with DEHP (Di-ethyl hexyl orthophosphoric acid). Nd was run via a triple ribbon assembly as the metal species on a VG Sector/WARP thermal ionization mass spectrometer in static analyses of the La Jolla standard yielded <sup>143</sup>Nd/<sup>144</sup>Nd = 0.511858 ± 6 (n = 8). Sm was run on single Re using a Ta activator solution, again in static mode.

<sup>\*\*\*</sup> ε<sub>Nd</sub> calculated at the estimated age of the unit.
